# Supplementary material for: Study design and baseline profile for adults with type 2 diabetes in the once-weekly subcutaneous SEmaglutide randomized PRAgmatic (SEPRA) trial
Source: HighWire-hosted journal article supplement (doi:10.1136/bmjdrc-2022-003206), 2023-05-01
Supplement: bmjdrc-2022-003206supp001_data_supplement.pdf [file bmjdrc-2022-003206supp001_data_supplement.pdf]

## Supplemental material

### Study design and baseline profile for adults with type 2 diabetes in the once-weekly subcutaneous SEmaglutide randomized PRAgmatic (SEPRA) trial

#### Contents

|                                                                                                                                                                                                                                      |    |
|--------------------------------------------------------------------------------------------------------------------------------------------------------------------------------------------------------------------------------------|----|
| Supplemental table 1 Study endpoints and other variables by data source .....                                                                                                                                                        | 2  |
| Supplemental table 2 Summary of assessments.....                                                                                                                                                                                     | 6  |
| Supplemental table 3 Geographical distribution and specialty of participating study sites .....                                                                                                                                      | 9  |
| Supplemental table 4 Summary of the independently assessed PRECIS-2 scores from each individual in the study steering group and the overall consensus reached following discussions during a workshop meeting in December 2018. .... | 10 |
| Supplemental figure 1 The PRECIS-2 assessment of the SEPRA trial.....                                                                                                                                                                | 11 |
| Appendix 1. Description of patient reported outcomes, clinician reported outcomes, and diabetes treatment satisfaction .....                                                                                                         | 12 |
| Appendix 2. Study investigators.....                                                                                                                                                                                                 | 13 |
| REFERENCES.....                                                                                                                                                                                                                      | 17 |

**Supplemental table 1 Study endpoints and other variables by data source**

| Endpoint/variable                                                                                                            | Data source |                            |
|------------------------------------------------------------------------------------------------------------------------------|-------------|----------------------------|
|                                                                                                                              | eCRF        | Administrative claims data |
| Study drug variables                                                                                                         |             |                            |
| On/off study drug                                                                                                            | X           |                            |
| Treatment intensification                                                                                                    | X           |                            |
| Treatment change                                                                                                             | X           |                            |
| Anti-diabetes treatment patterns                                                                                             | X           |                            |
| Primary endpoint                                                                                                             |             |                            |
| HbA1c <7.0% at year 1                                                                                                        | X           |                            |
| Confirmatory endpoints                                                                                                       |             |                            |
| Change in HbA1c (%-point) from baseline to year 1                                                                            | X           |                            |
| HbA1c <7.0% at year 2                                                                                                        | X           |                            |
| Change in HbA1c (%-point) from baseline to year 1                                                                            | X           |                            |
| Supportive secondary endpoint assessment                                                                                     |             |                            |
| Individualized HbA1c target attained at year 1                                                                               | X           |                            |
| HbA1c <7.0% (53 mmol/mol) or at least 1%-point improvement in HbA1c at year 1                                                | X           |                            |
| HbA1c target attainment per HEDIS criteria (<8.0% if age ≥65 years or with defined comorbidities, otherwise <7.0%) at year 1 | X           | X                          |
| Change in body weight from baseline to year 1, lb                                                                            | X           |                            |
| Change in body weight from baseline to year 1, %                                                                             | X           |                            |
| Change in SBP from baseline to year 1, mmHg                                                                                  | X           |                            |
| Change in DBP from baseline to year 1, mmHg                                                                                  | X           |                            |
| Time to first study drug discontinuation during 2 years, day                                                                 | X           |                            |
| Time to first treatment intensification (add-on) or change (switch) after randomization during 2 years, day                  | X           |                            |
| Study drug medication adherence for the first year of the study, as measured by medication possession ratio, %               |             | X                          |
| Number of hypoglycemic episodes leading to an inpatient admission or ER encounter from baseline to year 2                    | X           |                            |
| DTSQc, total treatment satisfaction score at year 1                                                                          | X           |                            |
| DTSQc, total treatment satisfaction score at year 2                                                                          | X           |                            |
| Change from baseline in SF-12 v2, PCS-12 score at year 1                                                                     | X           |                            |
| Change from baseline in SF-12 v2, PCS-12 score at year 2                                                                     | X           |                            |
| Change from baseline in SF-12 v2, MCS-12 score at year 1                                                                     | X           |                            |
| Change from baseline in SF-12 v2, MCS-12 score at year 2                                                                     | X           |                            |
| Change from baseline in WPAI-GH absenteeism (work time missed) score at year 1                                               | X           |                            |
| Change from baseline in WPAI-GH absenteeism (work time missed) score at year 2                                               | X           |                            |
| Change from baseline in WPAI-GH presenteeism (impairment at work/reduced on-the-job effectiveness) score at year 1           | X           |                            |
| Change from baseline in WPAI-GH presenteeism (impairment at                                                                  | X           |                            |

| Endpoint/variable                                                                                                                                                                                                                                   | Data source |                            |
|-----------------------------------------------------------------------------------------------------------------------------------------------------------------------------------------------------------------------------------------------------|-------------|----------------------------|
|                                                                                                                                                                                                                                                     | eCRF        | Administrative claims data |
| work/reduced on-the-job effectiveness) score at year 2                                                                                                                                                                                              |             |                            |
| Change from baseline in WPAI-GH work productivity loss (overall work impairment/absenteeism plus presenteeism) score at year 1                                                                                                                      | X           |                            |
| Change from baseline in WPAI-GH work productivity loss (overall work impairment/absenteeism plus presenteeism) score at year 2                                                                                                                      | X           |                            |
| Change from baseline in WPAI-GH activity impairment score at year 1                                                                                                                                                                                 | X           |                            |
| Change from baseline in WPAI-GH activity impairment score at year 2                                                                                                                                                                                 | X           |                            |
| All cause HCRU from baseline to year 2                                                                                                                                                                                                              |             |                            |
| Number of inpatient admissions                                                                                                                                                                                                                      |             | X                          |
| Length of stay for inpatient admissions (days) per inpatient admission                                                                                                                                                                              |             | X                          |
| Cumulative length of stay for inpatient admissions (days)                                                                                                                                                                                           |             | X                          |
| Number of ER encounters                                                                                                                                                                                                                             |             | X                          |
| Number of physician office visits                                                                                                                                                                                                                   |             | X                          |
| Number of other outpatient encounters (overall, and by category: tests – lab, imaging, procedures, OT/speech, medication and related services, durable medication equipment, physician other services, tests – other, other)                        |             | X                          |
| Number of medications                                                                                                                                                                                                                               |             | X                          |
| Occurrence of inpatient admission                                                                                                                                                                                                                   |             | X                          |
| Occurrence of ER encounter                                                                                                                                                                                                                          |             | X                          |
| Occurrence of physician office visits                                                                                                                                                                                                               |             | X                          |
| Occurrence of other outpatient encounter (yes/no) (overall, and by category: tests – lab, imaging, procedures, OT/speech, medication and related services, durable medication equipment, physician other services, tests – other, other)            |             | X                          |
| Diabetes-related HCRU from baseline to year 2                                                                                                                                                                                                       |             |                            |
| Number of diabetes-related inpatient admissions                                                                                                                                                                                                     |             | X                          |
| Length of stay for diabetes-related inpatient admissions (days) per diabetes-related inpatient admissions                                                                                                                                           |             | X                          |
| Cumulative length of stay for diabetes-related inpatient admissions (days)                                                                                                                                                                          |             | X                          |
| Number of diabetes-related ER encounters                                                                                                                                                                                                            |             | X                          |
| Number of diabetes-related physician office visits                                                                                                                                                                                                  |             | X                          |
| Number of diabetes-related other outpatient encounters (overall, and by category: tests – lab, imaging, procedures, OT/speech, medication and related services, durable medication equipment, physician other services, tests – other, other)       |             | X                          |
| Number of diabetes-related medications                                                                                                                                                                                                              |             | X                          |
| Occurrence of diabetes-related inpatient admission                                                                                                                                                                                                  |             | X                          |
| Occurrence of diabetes-related ER encounter                                                                                                                                                                                                         |             | X                          |
| Occurrence of diabetes-related physician office visits                                                                                                                                                                                              |             | X                          |
| Occurrence of diabetes-related outpatient encounter (yes/no) (overall, and by category: tests – lab, imaging, procedures, OT/speech, medication and related services, durable medication equipment, physician other services, tests – other, other) |             | X                          |

| Endpoint/variable                                                                                                                                                      | Data source |                            |
|------------------------------------------------------------------------------------------------------------------------------------------------------------------------|-------------|----------------------------|
|                                                                                                                                                                        | eCRF        | Administrative claims data |
| Additional derived outcome variables for supportive analyses                                                                                                           |             |                            |
| Supportive measures of glycemic control                                                                                                                                |             |                            |
| Individualized HbA1c target attained at year 2                                                                                                                         | X           |                            |
| HbA1c <7.0% (53 mmol/mol) or at least 1%-point improvement in HbA1c compared to baseline at year 2                                                                     | X           |                            |
| HbA1c <8.0% (64 mmol/mol) at year 1                                                                                                                                    | X           |                            |
| HbA1c <8.0% (64 mmol/mol) at year 2                                                                                                                                    | X           |                            |
| HbA1c <7.0% (53 mmol/mol) and no further anti-diabetes medication intensification after randomization at year 1                                                        | X           |                            |
| HbA1c <7.0% (53 mmol/mol) and no further anti-diabetes medication intensification after randomization at year 2                                                        | X           |                            |
| HbA1c target attainment per HEDIS criteria (<8.0% if age ≥65 years or with defined comorbidities, otherwise <7.0%) at year 2                                           | X           | X                          |
| HbA1c <7.0% (53 mmol/mol) at year 1 in patients with HbA1c >9.0% at baseline                                                                                           | X           |                            |
| HbA1c <7.0% (53 mmol/mol) at year 2 in patients with HbA1c >9.0% at baseline                                                                                           | X           |                            |
| HbA1c <8.0% (64 mmol/mol) at year 1 in patients with HbA1c >9.0% at baseline                                                                                           | X           |                            |
| HbA1c <8.0% (64 mmol/mol) at year 2 in patients with HbA1c >9.0% at baseline                                                                                           | X           |                            |
| Body weight loss                                                                                                                                                       |             |                            |
| Change in body weight (%) from baseline to year 2                                                                                                                      | X           |                            |
| Change in body weight (lb) from baseline to year 2                                                                                                                     | X           |                            |
| Blood pressure                                                                                                                                                         |             |                            |
| Change in SBP (mmHg) from baseline to year 2                                                                                                                           | X           |                            |
| Change in DBP (mmHg) from baseline to year 2                                                                                                                           | X           |                            |
| Hypoglycemia                                                                                                                                                           |             |                            |
| Reported hypoglycemia leading to inpatient admission or ER encounter during year 1                                                                                     | X           |                            |
| Reported hypoglycemia leading to inpatient admission or ER encounter during year 2                                                                                     | X           |                            |
| Composite variables                                                                                                                                                    |             |                            |
| HbA1c <7.0% (53 mmol/mol) without experiencing hypoglycemia leading to inpatient admission or ER encounter and body weight loss of ≥5% vs baseline at year 1           | X           |                            |
| Absolute HbA1c reduction of ≥0.5% without experiencing hypoglycemia leading to inpatient admission or ER encounter and a body weight loss of ≥5% vs baseline at year 1 | X           |                            |
| HbA1c <7.0% (53 mmol/mol) without experiencing hypoglycemia leading to inpatient admission or ER encounter and body weight loss of ≥5% vs baseline at year 2           | X           |                            |
| Absolute HbA1c reduction of ≥0.5% without experiencing hypoglycemia leading to inpatient admission or ER encounter and a body weight loss of                           | X           |                            |

| Endpoint/variable                                                                                                                                        | Data source |                            |
|----------------------------------------------------------------------------------------------------------------------------------------------------------|-------------|----------------------------|
|                                                                                                                                                          | eCRF        | Administrative claims data |
| ≥5% vs baseline at year 2                                                                                                                                |             |                            |
| HbA1c <7.0% (53 mmol/mol) without experiencing hypoglycemia leading to inpatient admission or ER encounter and no body weight gain vs baseline at year 1 | X           |                            |
| HbA1c <7.0% (53 mmol/mol) without experiencing hypoglycemia leading to inpatient admission or ER encounter and no body weight gain vs baseline at year 2 | X           |                            |
| Adherence to treatment                                                                                                                                   |             |                            |
| Study drug medication adherence for the 2 years of the study, as measured by the medication possession ratio (%)                                         |             | X                          |

DBP, diastolic blood pressure; DTSQc, Diabetes Treatment Satisfaction Questionnaire, change version; eCRF, electronic case report form; ER, emergency room; HbA1c, glycated hemoglobin; HCRU, Healthcare Resource Utilization; HEDIS, Healthcare Effectiveness Data and Information Set; MCS-12, Mental Component Summary; OT, occupational therapy; PCS-12, Physical Component Summary; SBP, systolic blood pressure; SF-12 v2, Short Form 12-Item version 2 Survey; WPAI-GH, Work Productivity and Activity Impairment: General Health questionnaire.

**Supplemental table 2 Summary of assessments**

| SePra                                                                      | Dedicated study visit, randomization | Routine care visits, Year 1 | Dedicated study visit, Year 1 | Routine care visits, Year 2 | Dedicated study visit, Year 2 |
|----------------------------------------------------------------------------|--------------------------------------|-----------------------------|-------------------------------|-----------------------------|-------------------------------|
| Time of visit (weeks) <sup>a</sup>                                         | 0*                                   | 0–52**                      | 52±6                          | 52–104**                    | 104±6                         |
| Patient and treatment-related assessments <sup>b</sup>                     | X                                    |                             |                               |                             |                               |
| Informed consent <sup>c</sup>                                              | X                                    |                             |                               |                             |                               |
| Inclusion/exclusion criteria                                               | X                                    |                             |                               |                             |                               |
| Demographics (date of birth, gender, race, ethnicity)                      | X                                    |                             |                               |                             |                               |
| Selected medical history                                                   | X                                    |                             |                               |                             |                               |
| Diabetes history and diabetes complications                                | X                                    |                             |                               |                             |                               |
| Individualised HbA1c target <sup>d</sup>                                   | X                                    |                             |                               |                             |                               |
| Type of glucose-lowering medication including semaglutide <sup>e</sup>     | X                                    | X                           | X                             | X                           | X                             |
| Concomitant cardiovascular medication                                      | X                                    | X                           | X                             | X                           | X                             |
| Reason for discontinuation of any glucose-lowering medication              |                                      | X                           | X                             | X                           | X                             |
| Effectiveness and safety-related assessments                               |                                      |                             |                               |                             |                               |
| Body weight                                                                | X                                    | X                           | X                             | X                           | X                             |
| Height                                                                     | X                                    |                             |                               |                             |                               |
| SBP/DBP                                                                    | X                                    | X                           | X                             | X                           | X                             |
| HbA1c                                                                      | X <sup>f</sup>                       | X                           | X                             | X                           | X                             |
| SAEs, pregnancies, and AEs leading to study drug continuation <sup>g</sup> |                                      | X                           | X                             | X                           | X                             |
| Healthcare resource utilization <sup>h</sup>                               |                                      | X                           | X                             | X                           | X                             |
| Hypoglycemia leading to inpatient admission or ER encounter                |                                      | X                           | X                             | X                           | X                             |
| Hypoglycemia leading to inpatient admission or ER                          |                                      | X                           | X                             | X                           | X                             |

| SePra                                    | Dedicated study visit, randomization | Routine care visits, Year 1 | Dedicated study visit, Year 1 | Routine care visits, Year 2 | Dedicated study visit, Year 2 |
|------------------------------------------|--------------------------------------|-----------------------------|-------------------------------|-----------------------------|-------------------------------|
| encounter                                |                                      |                             |                               |                             |                               |
| PROs and physician-completed assessments |                                      |                             |                               |                             |                               |
| DTSQs                                    | X                                    |                             |                               |                             |                               |
| DTSQc                                    |                                      |                             | X                             |                             | X                             |
| SF-12 v2                                 | X                                    |                             | X                             |                             | X                             |
| WPAI-GH                                  | X                                    |                             | X                             |                             | X                             |
| PGI-S                                    | X                                    |                             |                               |                             |                               |
| PGI-C                                    |                                      |                             | X                             |                             | X                             |
| CGI-S                                    | X                                    |                             |                               |                             |                               |
| CGI-C                                    |                                      |                             | X                             |                             | X                             |
| End of study                             |                                      |                             |                               |                             |                               |
| End of study                             |                                      |                             |                               |                             | X                             |

\*Eligibility assessment may take place up to 4 weeks prior to the randomization visit. If eligibility assessment occurs prior to the randomization visit, any changes in collected medical history, diabetes history, diabetes complications, glucose-lowering medications and concomitant cardiovascular medications will be collected at the randomization visit.

\*\*The year 1 and year 2 routine diabetic care visit windows are determined by the date of the participant's dedicated year 1 study visit. The year 1 routine diabetic care visit window will end immediately prior to the dedicated year 1 study visit. The year 2 routine diabetic care visit window will begin immediately following the dedicated year 1 study visit.

Note: In this study, data will be collected from two different data sources:

1) Data entered into the eCRF will be collected at dedicated study visits and routine diabetic care visits (if available per local clinical practice) and will include demographics, selected medical history, diabetes medical history and diabetes complications, individualized HbA1c target, type of glucose-lowering medication, concomitant cardiovascular medication, reason for discontinuation of any glucose-lowering medication, body weight, height, SBP, DBP, HbA1c, AEs leading to study drug discontinuation, SAEs, pregnancies and hypoglycemia leading to inpatient admission or ER encounter. Of note, AEs leading to study drug discontinuation or SAEs will be collected from all interactions with the participant, as well as if discovered when reviewing documents from healthcare encounters with other providers. Additionally, PRO and clinician-reported outcome data will be collected at the dedicated study visits and entered into the eCRF.

2) Healthcare resource utilization and pharmacy prescription data will be extracted from health plan medical and pharmacy claims and will not be entered into the eCRF.

<sup>a</sup>Routine diabetic care visits will follow standard of care frequency and any available data will be entered in the eCRF.

<sup>b</sup>Assessments at dedicated study visits will be collected in eCRF. Assessments at routine diabetic care visits will be collected as available/according to local clinical practice in eCRF.

<sup>c</sup>Informed consent must be obtained before any study related activities.

<sup>d</sup>Individualized HbA1c target must be set and documented prior to randomization.

<sup>e</sup>Medication data (glucose-lowering medications and/or concomitant cardiovascular medications) collected at study visits only include medications that are current at time of study visit.

<sup>f</sup>The HbA1c value is based on historical data collected from the treating study physician and is the value closest to the date of randomization, within the last 90 days.

<sup>g</sup>Any SAE identified from any encounter or notation at any time must be reported.

<sup>h</sup>Data from health plan medical and pharmacy claims. Data will be extracted at the end of the study but will include data from participant randomization through end of study or withdrawal.

AE, adverse event; CGI-C, Clinical Global Impression-Change; CGI-S, Clinical Global Impression-Severity; DBP, diastolic blood pressure; DTSQc, Diabetes Treatment Satisfaction Questionnaire, change version; DTSQs, Diabetes Treatment Satisfaction Questionnaire, status version; eCRF, electronic case report form; ER, emergency room; PGI-C, Patient Global Impression-Change; PGI-S, Patient Global Impression-Severity; PRO, patient-reported outcome; SAE, serious adverse event; SBP, systolic blood pressure; SF-12 v2, Short Form 12-Item version 2; WPAI-GH, Work Productivity and Activity Impairment: General Health questionnaire.



**Supplemental table 3 Geographical distribution and specialty of participating study sites**

|                                                   | <b>Overall (N=1278), %</b> |
|---------------------------------------------------|----------------------------|
| <b>Geographic region</b>                          |                            |
| Northeast                                         | 167 (13.1)                 |
| Midwest                                           | 333 (26.1)                 |
| South                                             | 561 (43.9)                 |
| West                                              | 217 (17.0)                 |
|                                                   | <b>Overall (N=138), %</b>  |
| <b>Site specialty</b>                             |                            |
| Primary care, internal medicine, family medicine  | 100 (72.5)                 |
| Endocrinology                                     | 38 (27.5)                  |
| <b>Sites with semaglutide research experience</b> |                            |
| Yes                                               | 32 (23.2)*                 |
| No                                                | 106 (76.8)                 |

\*Of the 32 study physicians at research-experienced sites, 29 were primary care physicians and three were endocrinologists.

**Supplemental table 4 Summary of the independently assessed PRECIS-2 scores from each individual in the study steering group and the overall consensus reached following discussions during a workshop meeting in December 2018.**

| Domain                 | A | B | C | D | E | F | G | H | I | J   | K | Consensus score |
|------------------------|---|---|---|---|---|---|---|---|---|-----|---|-----------------|
| Eligibility criteria   | 5 | 4 | 4 | 4 | 4 | 4 | 5 | 5 | 4 | 3–4 | 4 | 4               |
| Recruitment path       | 4 | 5 | 5 | 4 | 4 | 5 | 5 | 4 | 4 | 5   | 3 | 5               |
| Setting                | 5 | 5 | 5 | 4 | 5 | 5 | 5 | 5 | 5 | 4   | 5 | 5               |
| Organisation           | 4 | 4 | 4 | 4 | 5 | 5 | 4 | 5 | 4 | 4   | 4 | 4               |
| Flexibility: delivery  | 5 | 5 | 4 | 5 | 5 | 5 | 5 | 5 | 5 | 4   | 5 | 5               |
| Flexibility: adherence | 5 | 5 | 5 | 5 | 5 | 5 | 5 | 5 | 5 | 4   | 4 | 5               |
| Follow-up              | 4 | 4 | 5 | 4 | 4 | 4 | 4 | 4 | 4 | 5   | 2 | 4               |
| Outcome                | 5 | 4 | 5 | 4 | 4 | 4 | 4 | 4 | 4 | 3–4 | 4 | 4               |
| Analysis               | 5 | 5 | 5 | 5 | 5 | 5 | 3 | 5 | 5 | 5   | 3 | 5               |

PRECIS-2, PRagmatic Explanatory Continuum Indicator Summary-2.

Supplemental figure 1 The PRECIS-2 assessment of the SEpra trial

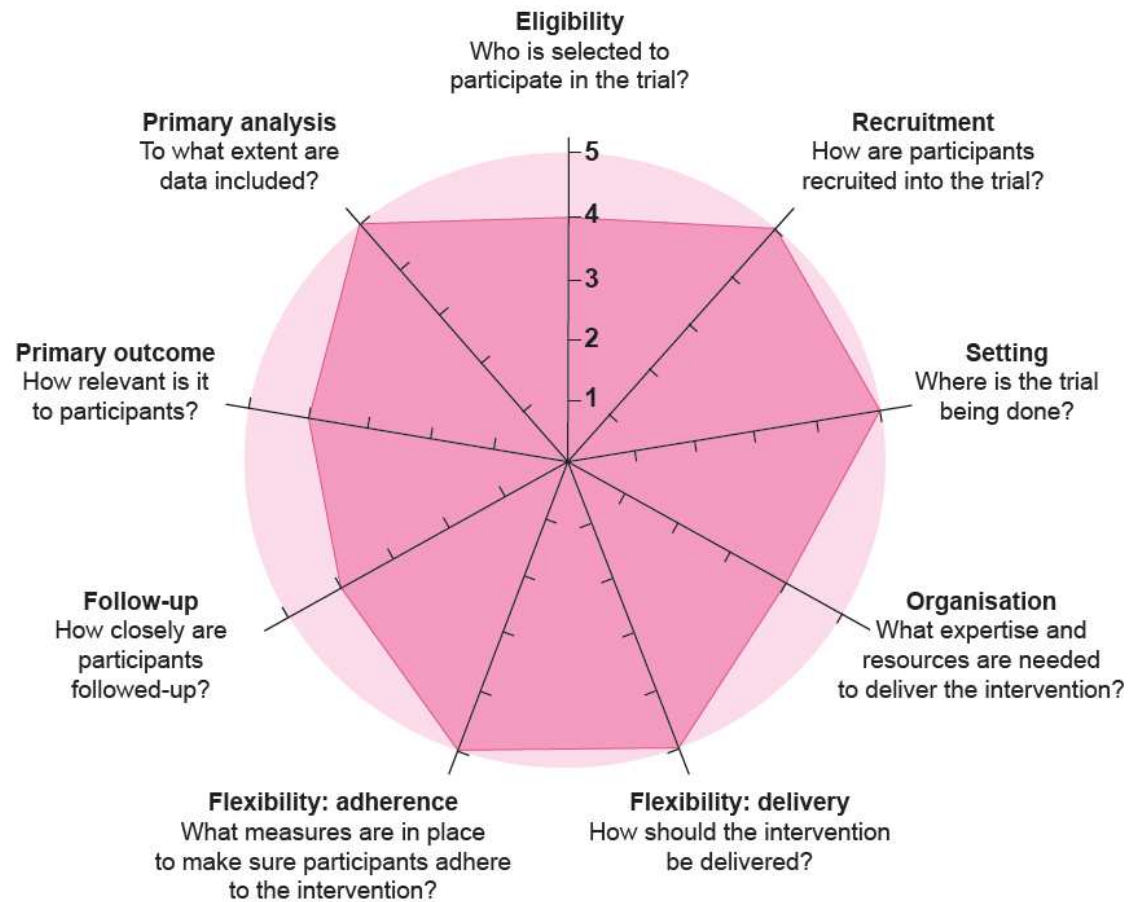

The tool uses a 5-point Likert scale, where 1 = very explanatory and 5 = very pragmatic.<sup>1</sup>

PRECIS-2, PRagmatic Explanatory Continuum Indicator Summary-2.

## **Appendix 1. Description of patient reported outcomes, clinician reported outcomes, and diabetes treatment satisfaction**

### **Diabetes Treatment Satisfaction Questionnaire (DTSQ)<sup>2-5</sup>**

The DTSQ was included in the trial to evaluate patient satisfaction with treatment compared with prior treatment. The DTSQ status version was completed at randomization and the DTSQ change (DTSQc) version will be completed at year 1 and year 2. The DTSQc version employs eight questions that are answered using a Likert scale from -3 to +3 (-3 = much less satisfied now to +3 = much more satisfied now) with 0 (midpoint), representing no change. The scores to six questions are added together to produce a total treatment satisfaction score. The remaining two questions concern perceived frequency of hyperglycemia and perceived frequency of hypoglycemia, respectively. The DTSQc total treatment satisfaction score ranges from -18 to +18, with higher scores associated with greater treatment satisfaction.

### **Short Form 12-Item version 2 (SF-12 v2) Health Survey<sup>6</sup>**

The SF-12 v2 questionnaire was included in the trial to assess physical and mental functioning and overall health-related quality of life. The following two summary scores are used as endpoints: Physical Component Summary score and Mental Component Summary score. The scores are norm scored such that the scores range from 0–100 with a mean of 50 and standard deviation of 10. The higher the score, the better quality of life; the lower the score, the poorer quality of life.

### **Work Productivity and Activity Impairment: General Health (WPAI-GH) questionnaire<sup>7</sup>**

The WPAI-GH assesses work productivity and activity impairment attributable to general health. There are four types of scores: absenteeism (ie, work time missed), presenteeism (ie, impairment at work/reduced on-the-job effectiveness), work productivity loss (ie, overall work impairment/absenteeism plus presenteeism), and activity impairment (eg, work around the house, shopping, exercising, childcare, studying). Outcomes are expressed as percentages with higher numbers indicating greater impairment and less productivity, ie, worse outcomes (percent work time missed due to health, percent impairment while working due to health, percent overall work impairment due to health, percent activity impairment due to health).

### **Patient Global Impression of Disease Severity (PGI-S) and Patient Global Impression of Change (PGI-C)**

The PGI-S is a 1-item measure that assesses the patient's impression of disease severity based on their present diabetes symptoms (ie, normal, mild, moderate, or severe). The PGI-C assesses the patient's impression of changes in diabetes symptoms, based on their diabetes symptoms now, compared with how they were before they began taking the study drug (ie, very much better, much better, a little better, no change, a little worse, much worse, or very much worse).

### **Clinician Global Impression of Disease Severity (CGI-S) and Clinician Global Impression of Change (CGI-C)**

The CGI-S and CGI-C were included in the study to assess disease severity from the treating study physician's perspective. The CGI-S is a 1-item measure that assesses the clinician's impression of the patient's disease severity, based on the patient's present diabetes symptom (ie, normal, mild, moderate, or severe). The CGI-C assesses the clinician's impression of change in the patient's diabetes symptoms, based on the patient's diabetes symptoms now, compared with how they were before they began taking the study drug (ie, very much better, much better, a little better, no change, a little worse, much worse, or very much worse).

**Appendix 2. Study investigators**

| <b>Name</b>          | <b>Institution</b>                                                           | <b>City</b>      | <b>State</b> | <b>Zip</b> |
|----------------------|------------------------------------------------------------------------------|------------------|--------------|------------|
| Angela Davis         | Family Health Care Center                                                    | Statesboro       | GA           | 30461      |
| Steven Saunders      | Steven L. Saunders MD LLC                                                    | Milford          | CT           | 06460      |
| Joselito Cabaccan    | Joselito C Cabaccan MD                                                       | San Jose         | CA           | 95148      |
| Brian McCormick      | Hampton Family Practice PLLC                                                 | Hampton          | VA           | 23666      |
| Minesh Shah          | Chatham Family Medical Center Inc                                            | Chatham          | VA           | 24531      |
| Pradeep Kamboj       | Altura Centers For Health                                                    | Tulare           | CA           | 93274      |
| Zouhair Bibi         | The Endocrine & Diabetes Center                                              | Owensboro        | KY           | 42303      |
| James Chu            | Monterey Endocrine & Diabetes Institute                                      | Monterey         | CA           | 93940      |
| Robert Busch         | Albany Medical College, Division of Community                                | Albany           | NY           | 12203      |
| Bradley Eilerman     | St Elizabeth Regional DBTS Center                                            | Covington        | KY           | 41011      |
| Steven Von Elten     | Piedmont Family Practice Plc                                                 | Warrenton        | VA           | 20186      |
| Daniel Pomposini     | Privia Medical Group LLC                                                     | Danville         | VA           | 24541      |
| Kyle Cannady         | East Georgia Healthcare Center Inc                                           | Swainsboro       | GA           | 30401      |
| Edward McDavid       | Sandersville Family Practice                                                 | Sandersville     | GA           | 31082      |
| Ronald Watts         | Eagles Landing Diabetes/Endocrinology                                        | Stockbridge      | GA           | 30281      |
| Paul Bradley         | Meridian Clinical Research                                                   | Savannah         | GA           | 31406      |
| Kishor Dabhi         | Swift Creek Family Care                                                      | Colonial Heights | VA           | 23834      |
| Glenn Heigerick      | Beaver Ruin Primary Care                                                     | Lilburn          | GA           | 30047      |
| Anu George           | Seven Corners Medical                                                        | Falls Church     | VA           | 22044      |
| Daniel Horton        | Infectious Diseases Associates of Central Virginia                           | Lynchburg        | VA           | 24501      |
| Benjamin Mailloux    | WCMP-Family Medicine                                                         | Belfast          | ME           | 04915      |
| Sean Lynch           | Southern Family Medical Center                                               | Augusta          | GA           | 30906      |
| Robert Kaufmann      | The Kaufmann Clinic Inc                                                      | Atlanta          | GA           | 30308      |
| Moussa Alhaj         | Regional Endocrine and Diabetes Associate                                    | Ashland          | KY           | 41101      |
| Raymond Tidman       | River Birch Research Alliance LLC                                            | Blue Ridge       | GA           | 30513      |
| Lianna Lawson        | Lawson Family Medicine and Aesthetics                                        | Daleville        | VA           | 24083      |
| Howard Harrison      | Endocrinology Consultants                                                    | Virginia Beach   | VA           | 23454      |
| Caroline Huang       | The Endocrinology Group PLLC                                                 | Arlington        | VA           | 22205      |
| Naila Goldenberg     | Functional Endocrinology                                                     | Mason            | OH           | 45040      |
| Mark DeBello         | Associated Surgeons and Physicians LLC                                       | Fort Wayne       | IN           | 46825      |
| Do Eun Lee           | Do-Eun Lee MD INC                                                            | Lafayette        | CA           | 94549      |
| Alexander Osowa      | Gwinnett Research Institute/Buford Family Practice and Urgent Care Center PC | Buford           | GA           | 30519      |
| Marie Elena Cordisco | Western Connecticut Health Network                                           | Danbury          | CT           | 06810      |
| Adam Mayerson        | Endocrine Associates of Connecticut                                          | Hamden           | CT           | 06517      |

| Name                      | Institution                                               | City           | State | Zip   |
|---------------------------|-----------------------------------------------------------|----------------|-------|-------|
| Richard Allen             | Om Research LLC                                           | Lancaster      | CA    | 93534 |
| Sina Tebi                 | Care Access Research Santa Clarita                        | Santa Clarita  | CA    | 91321 |
| Jon Condit                | American Health Network of IN, LLC                        | Muncie         | IN    | 47304 |
| Hicham Siouty             | Adnab Research/Prestige Care Physician                    | Torrance       | CA    | 90505 |
| G. Mitch Cornett          | American Health Network of IN, LLC                        | Franklin       | IN    | 46131 |
| Nicholas (Kemdi) Ihenacho | First Medical Research Center                             | Stone Mountain | GA    | 30083 |
| Brian Heimer              | American Health Network of IN, LLC                        | New Albany     | IN    | 47150 |
| Eric Hewitt               | American Health Network of IN, LLC                        | Avon           | IN    | 46123 |
| Talessa Powell            | American Health Network of IN, LLC                        | Greenfield     | IN    | 46140 |
| Minesh Patel              | LaPorte County Institute for Clinical Research, Inc       | Michigan City  | IN    | 46360 |
| Sabrina Rene              | IACT Health                                               | Newnan         | GA    | 30265 |
| Steven Leichter           | IACT Health                                               | Columbus       | GA    | 31904 |
| Christopher Case          | Jefferson City Medical Group                              | Jefferson City | MO    | 65109 |
| Arvind Krishna            | Diabetes & Endocrinology Associates of Stark County, Inc. | Canton         | OH    | 44718 |
| Nimisha Trivedi           | Privia Medical Group of Georgia LLC                       | Locust Grove   | GA    | 30248 |
| David Ramstad             | Hampton Roads Center for Clinical Research                | Suffolk        | VA    | 23435 |
| Michael Dao               | SC Clinical Research, Inc                                 | Garden Grove   | CA    | 92844 |
| Betul Hatipoglu           | University Hospitals Cleveland Medical Center             | Cleveland      | OH    | 44106 |
| Stephen Brietzke          | University of Missouri                                    | Columbia       | MO    | 65201 |
| Henry Naddaf              | Toledo Clinic Inc.                                        | Toledo         | OH    | 43606 |
| Joseph Camire             | Missouri Highland Health Care                             | Eminence       | MO    | 65466 |
| Monique Sessler           | Family Care of Williamsburg                               | Williamsburg   | VA    | 23188 |
| Neda Rasouli              | University of Colorado Denver                             | Aurora         | CO    | 80045 |
| Norman Fishman            | Diabetes & Endocrinology Specialists Inc                  | Chesterfield   | MO    | 63017 |
| Andras Fenyves            | Prominis Medical Services PC                              | Brooklyn       | NY    | 11221 |
| Kent Lehman               | Adams County Family Physicians                            | Berne          | IN    | 46711 |
| Matthew Finneran          | Family Practice Center of Wadsworth, Inc.                 | Wadsworth      | OH    | 44281 |
| Howard Andrew Selinger    | Manchester Memorial Hospital Family Medicine Residency    | Manchester     | CT    | 06040 |
| John Abraham              | Trinity Healthcare                                        | Springfield    | MO    | 65803 |
| Charles Saha              | Elligo Health Research Inc                                | New York       | NY    | 10028 |
| Abdelshaheed Samir        | Family Medicine Healthcare                                | Portsmouth     | VA    | 23701 |
| Jewel Stevens             | Medical Frontiers, LLC                                    | Carlisle       | OH    | 45005 |
| Binu George               | DC Research Works                                         | Marietta       | GA    | 30060 |
| Babita Patel              | Halifax Internal Medicine                                 | South Boston   | VA    | 24592 |

| Name                        | Institution                                          | City          | State | Zip   |
|-----------------------------|------------------------------------------------------|---------------|-------|-------|
| Ismail Tarkhan              | Ismail Tarkhan MD                                    | Milford       | CT    | 06460 |
| Ahmed Al-Jebawi             | St. Vincent Anderson Hospital                        | Anderson      | IN    | 46016 |
| Anil Modi                   | Medical Care of LaGrange                             | Lagrange      | GA    | 30240 |
| Sarita Golikeri Subramaniam | Tidewater Physicians Multispecialty Group            | Williamsburg  | VA    | 23188 |
| Charles Judy                | Family Health Clinic                                 | Radford       | VA    | 24141 |
| Javier Morales              | Advanced Internal Medicine Group, PC                 | Greenvale     | NY    | 11548 |
| David Doriguzzi             | New Hope Consulting & Clinical Trials                | Lancaster     | CA    | 93534 |
| Jyoti Bhat                  | Diabetes and Endocrinology Specialists               | Walnut Creek  | CA    | 94598 |
| Courtney Shelton            | Primary Care Research                                | Atlanta       | GA    | 30312 |
| Jonas Leibowitz             | EDOC LLP                                             | Yonkers       | NY    | 10704 |
| Anastasios Manessis         | NYC Research, Inc                                    | New York      | NY    | 10001 |
| Phillip O'Donnell           | Selma Medical Associates, Inc.                       | Winchester    | VA    | 22601 |
| Akankasha Goyal             | NYU Langone Health                                   | New York      | NY    | 10016 |
| Adam Sherman                | Adam B. Sherman D O Professional Corp.               | Oxnard        | CA    | 93030 |
| Elias Siraj                 | Eastern Virginia Medical School                      | Norfolk       | VA    | 23510 |
| Catherine LaRuffa           | Catherine LaRuffa, M.D., Inc.                        | Blanchester   | OH    | 45107 |
| Minh Mach                   | Endocrine Specialty Consultant Inc.                  | Burbank       | CA    | 91505 |
| Cedrice Davis               | Urban Family Practice Associates, PC                 | Marietta      | GA    | 30067 |
| Tariq Javed                 | Tariq Javed, MD Inc                                  | Visalia       | CA    | 93277 |
| John Gilbert                | St. Joseph Heritage Healthcare                       | Fullerton     | CA    | 92835 |
| Juan Posada                 | Posada, Juan                                         | San Jose      | CA    | 95116 |
| Joshua Ordway               | Franklin Family Practice                             | Springboro    | OH    | 45005 |
| Thomas Jones                | Tom H. Jones                                         | Avon          | IN    | 46123 |
| Yael Harris                 | Northwell Health                                     | Great Neck    | NY    | 11021 |
| Warren Theis                | Coastal Care Medical Clinic                          | Waycross      | GA    | 31501 |
| Samer Nakhle                | Palm Research Center                                 | Las Vegas,    | NV    | 89148 |
| Aliaksandr Trusau           | Prevea Health                                        | Green Bay     | WI    | 54229 |
| Augusto Focil               | FOMAT Medical Research                               | Oxnard        | CA    | 93030 |
| Etsegenet Ayele             | Pacific Clinical studies                             | Los Alamitos  | CA    | 90720 |
| Gaurang Shah                | Gaurang B. Shah, MD                                  | Richmond      | KY    | 40475 |
| Bryan Chastain              | Ascend Research Centers, Inc.                        | McMinnville   | TN    | 37110 |
| Charles Lovell              | York Clinical Research, LLC                          | Norfolk       | VA    | 23504 |
| Andy Dang                   | Facey Medical Foundation                             | Mission Hills | CA    | 91345 |
| Surya Patel                 | Patel Medical Center                                 | Irvington     | KY    | 40146 |
| Lori Gerard                 | Denver Endocrinology Diabetes and Thyroid Center, PC | Englewood     | CO    | 80113 |
| Christopher Weber           | Ascension Medical Group - Germantown Clinic          | Germantown    | WI    | 53022 |
| Christian Gastelum          | PIH Health Physicians Endocrinology                  | Whittier      | CA    | 90606 |
| Bharathi Raju               | South County Endocrinology and Obesity Medicine, LLC | Saint Louis   | MO    | 63128 |

| Name                                | Institution                                                            | City           | State | Zip   |
|-------------------------------------|------------------------------------------------------------------------|----------------|-------|-------|
| Jeffrey Green                       | Paris Family Physicians PLLC                                           | Paris          | KY    | 40361 |
| Thuy Huynh                          | Pacific Medical Center                                                 | Milpitas       | CA    | 95035 |
| Sanjiv Gupta                        | Tri State Primary Care, Grayson Health Park                            | Ashland        | KY    | 41101 |
| Srividya Kidambi                    | Medical College of Wisconsin                                           | Milwaukee      | WI    | 53226 |
| Gary Bedel                          | Prestige Clinical Research                                             | Franklin       | OH    | 45005 |
| Airani Sathananthan                 | Western University of Health Sciences                                  | Pomona         | CA    | 91766 |
| Samuel Lee                          | Sasha-Lee Inc - Corporation Lane Research Center                       | Virginia Beach | VA    | 23462 |
| Lee (Charles) Ginsburgh             | C. Lee Ginsburgh MD                                                    | Newport News   | VA    | 23606 |
| Sandeep Dhindsa                     | Saint Louis University                                                 | St. Louis      | MO    | 63104 |
| James E Gutmann<br>Lauren F Veaszey | Deaconess Clinic, Inc.                                                 | Evansville     | IN    | 47725 |
| Michael Marsh                       | Premiere Medical Center of Burbank, Inc.an Elligo Health Research Site | Toluca Lake    | CA    | 91602 |
| Shukri Makhoul                      | Sugarloaf Medical, PC                                                  | Suwanee,       | GA    | 30024 |
| Bernard Grunstra                    | PMG Research of Bristol, LLC                                           | Bristol        | TN    | 37620 |
| Lee Herman                          | Herman Clinical Research, LLC                                          | Suwanee        | GA    | 30024 |
| Farah Mubarak Ali                   | Atlanta Center for Clinical Research                                   | Roswell        | GA    | 30075 |
| Natalie Frentz                      | Beacon Medical Group Swartz-Weikamp                                    | Mishawaka      | IN    | 46544 |
| Erica Kretchman                     | Reid Endocrinology Center                                              | Richmond       | IN    | 47374 |
| Steven Bauer                        | OnSite Clinical Solutions, LLC                                         | Charlotte      | NC    | 28277 |
| Larry Berman                        | OnSite Clinical Solutions, LLC                                         | Charlotte      | NC    | 28210 |
| Richard Murphy                      | Murphy Research Center                                                 | Humboldt       | TN    | 38343 |
| Mercedes Samson                     | American Clinical Trials                                               | Buena Park     | CA    | 90620 |
| Charles Sharpe                      | Athens Medical Group                                                   | Athens         | TN    | 37303 |
| Joseph Woolley                      | Chrysalis Clinical Research LLC                                        | St. George     | UT    | 84790 |
| Brent Hella                         | Valley Weight Loss Clinic                                              | Fargo          | ND    | 58103 |
| Richard Lorraine                    | Harleysville Medical Associates                                        | Harleysville   | PA    | 19438 |
| Imran Siddiqui                      | Simcare Medical Research, LLC                                          | Sugarland      | TX    | 77469 |
| Brian Feldman                       | Central Ohio Clinical Research LLC                                     | Columbus       | OH    | 43213 |
| Robert Detweiler                    | Detweiler Family Medicine and Associates, PC                           | Lansdale       | PA    | 19446 |
| Peter Gagianas                      | Primary Care Research South, Inc                                       | McMurray       | PA    | 15317 |
| Randal Jacks                        | Christus Trinity Clinic Hill Country Landa                             | New Braunfels  | TX    | 78130 |
| Bryce Palchick                      | Preferred Primary Care Physicians, Inc.                                | Pittsburgh     | PA    | 15236 |
| Jeffrey Deitch                      | Tri-County Research, Inc.                                              | Sterling Hts   | MI    | 48310 |



## REFERENCES

- 1 Loudon K, Treweek S, Sullivan F, Donnan P, Thorpe KE, Zwarenstein M. The PRECIS-2 tool: designing trials that are fit for purpose. *BMJ* 2015;350:h2147.
- 2 Bradley C. Handbook of Psychology and Diabetes: A Guide to Psychological Measurement in Diabetes Research: London: Routledge 1994.
- 3 Bradley C. Diabetes treatment satisfaction questionnaire. Change version for use alongside status version provides appropriate solution where ceiling effects occur. *Diabetes Care* 1999;22:530-2.
- 4 Bradley C, Speight J. Patient perceptions of diabetes and diabetes therapy: assessing quality of life. *Diabetes Metab Res Rev* 2002;18:S64-9.
- 5 Bradley C, Plowright R, Stewart J, Valentine J, Witthaus E. The Diabetes Treatment Satisfaction Questionnaire change version (DTSQc) evaluated in insulin glargine trials shows greater responsiveness to improvements than the original DTSQ. *Health Qual Life Outcomes* 2007;5:57.
- 6 Ware J, Jr., Kosinski M, Keller SD. A 12-Item Short-Form Health Survey: construction of scales and preliminary tests of reliability and validity. *Med Care* 1996;34:220-33.
- 7 Reilly MC, Zbrozek AS, Dukes EM. The validity and reproducibility of a work productivity and activity impairment instrument. *Pharmacoeconomics* 1993;4:353-65.
